# Supplementary material for: Imaging East European Craton margin in Northern Poland usingextended-correlation processing applied to regional reflection seismicprofiles
Source: Copernicus journal article supplement (doi:10.5194/se-2019-26), 2019-02-21
Supplement: Supplementary file [file se-2019-26-RC1-supplement.pdf]

# Imaging East European Craton margin in Northern Poland using extended-correlation processing applied to regional reflection seismic profiles

Miłosz Mężyk<sup>1</sup>, Michał Malinowski<sup>1</sup>, Stanisław Mazur<sup>2</sup>

<sup>1</sup>Institute of Geophysics Polish Academy of Sciences, Warsaw, 01-452, Poland

<sup>2</sup>Institute of Geological Sciences Polish Academy of Sciences, 00-818, Warsaw, Poland

Correspondence to: Miłosz Mężyk (mmezyk@igf.edu.pl)

**Abstract.** In NE Poland, the Eastern European Craton (EEC) crust of the Fennoscandian affinity is concealed under a Phanerozoic platform cover and penetrated by the sparse deep research wells. Most of the inferences regarding its structure rely on geophysical data. Until recently, this area was covered only by the refraction/wide-angle reflection (WARR) profiles, which show a relatively simple crustal structure with a typical cratonic 3-layer crust. ION Geophysical PolandSPAN™ regional seismic program, acquired over the marginal part of the EEC in Poland, offered a unique opportunity to derive a detailed image of the deeper crust. Here, we apply extended correlation processing to a subset (~950 km) of the PolandSPAN™ dataset located in NE Poland, which enabled us to extend the nominal record length of the acquired data from 12 to 22 s (~60 km depth). Our new processing revealed reflectivity patterns, that we primarily associate with the Paleoproterozoic crust formation during the Svekofennian (Svekobaltic) orogeny and which are similar to what was observed along the BABEL and FIRE profiles in the Baltic Sea and Finland, respectively. We propose a mid- to lower-crustal lateral flow model to explain the occurrence of two sets of structures that can be collectively interpreted as kilometre-scale S-C' shear zones. The structures define a penetrative deformation fabric invoking ductile extension of hot orogenic crust. Localized reactivation of these structures provided conduits for subsequent emplacement of gabbroic magma that produced a Mesoproterozoic anorthosite-mangerite-charnockite-granite (AMCG) suite in NE Poland. Delamination of overthickened orogenic lithosphere may have accounted for magmatic underplating and fractionation into the AMCG plutons. We also found sub-Moho dipping mantle reflectivity, which we tentatively explain as a signature of the crustal accretion during the Svekofennian orogeny. Later tectonic phases (e.g. Ediacaran rifting, Caledonian orogeny) did not leave a clear signature in the deeper crust, however, some of the subhorizontal reflectors below the basement, observed in the vicinity of the AMCG Mazury complex, can be alternatively linked with lower Carboniferous magmatism.

## 1 Introduction

The Precambrian East European Craton (EEC) is composed of three major crustal blocks: Fennoscandia, Sarmatia and Wolgo-Uralia (Gorbatshev and Bogdanova, 1993). Fennoscandia was formed in the Paleoproterozoic during the Svecofennian orogeny (see e.g., Lahtinen et al., 2009). Its crust was imaged by several deep reflection profiles mostly offshore (Baltic Sea) (Abramovitz et al., 1997; BABEL Working Group, 1993; Korja and Heikkinen, 2005; Meissner and Krawczyk, 1999) with a notable exception of the FIRE project onshore Finland (Kukkonen and Lahtinen, 2006; Torvela et al., 2013). In NE Poland, the Fennoscandian crust is concealed under a Phanerozoic platform cover and is penetrated by the sparse deep research wells (see Krzemińska et al., 2017 for a recent summary). Therefore, most of the inferences regarding its structure rely on the geophysical data. Until recently, this area was covered only by the refraction/wide-angle reflection (WARR) profiles from the POLONAISE'97 project (P2, P3, P4, P5 profile, Czuba et al., 2002; Grad et al., 2003; Janik et al., 2002; Środa et al., 1999) and legacy LT transects (LT-7 profile, Guterch et al., 1994). They portrait relatively simple crustal structure with typical cratonic 3-layer crust (Grad et al., 2010). Experimental deep reflection seismic profile GB1 shot in the 80s revealed complex reflectivity patterns in the deeper crust of the Pomerania region (Dziewinska and Tarkowski, 2016), but the low quality of the seismic data precludes any definite interpretation. It was only recently, that this area was covered by the deep reflection seismic profiles of the ION Geophysical PolandSPAN™ project. In 2012, ten PolandSPAN™ profiles (with a total length of 2200 km) were acquired in Poland over the marginal part of the EEC, east of the Teisseyre-Tornquist Zone (TTZ). This large, regional seismic program aimed at providing a better understanding of the sedimentary history, tectonic architecture and basement structure of the lower Paleozoic shale basins (Krzywiec et al., 2013). Because of its regional character and unprecedented imaging quality, PolandSPAN™ data already revolutionized several aspects of the regional geology of Poland. They were used as constraints for potential-field modelling that led to the new interpretation of the TTZ (Mazur et al., 2015, 2016b) and Polish Caledonides (Mazur et al., 2016a). In SE Poland, interpretation of the PolandSPAN™ profiles proved that the Variscan deformations are extending much further to the east than previously assumed (Krzywiec et al., 2017a, 2017b). Malinowski (2016) proved that these data can be effectively used to study the deep crustal structure by employing the extended correlation method of Okaya and Jarchow (1989), showing, e.g. presence of the reflective lower crust underlying the EEC in SE Poland, previously imaged by the POLCRUST-01 profile (Malinowski et al., 2013, 2015).

Here, we apply the extended correlation processing to a subset of the PolandSPAN™ data located in NE Poland: 3 dip (5400, 5500, 5600) and 2 strike profiles (1100, 1200) with a total length of ~950 km. Since the Precambrian in Poland is concealed beneath a Phanerozoic platform cover and all the previous inferences were based on the sparse deep research wells available (Krzemińska et al., 2017), it is for the first time possible to shed a light on the characteristics of the deeper EEC crust in NE Poland. The key questions we would like to address using these new data are as follows: (i) is the image of the Svecofennian orogen in NE Poland similar to what is observed further north in Fennoscandia, e.g. in the Bothnian Bay (Korja and Heikkinen, 2005) and onshore Finland (Torvela et al., 2013)?, (ii) do we see a crustal expression of the Mesoproterozoic magmatism?, (iii) are the later tectonic events (like Ediacaran rifting of Rodinia or Caledonian tectonics) also recognizable in the crustal reflectivity patterns? We start with the geological background, then we summarize the processing steps focused on enhancing deeper reflectivity and finally we present the new results and integrate them with the existing geological observations to provide some preliminary interpretation of the crustal structure in NE Poland.

## 2 Geological background

The study area is located in NE Poland at the western margin of the EEC/Fennoscandia (Fig. 1). Its core was formed during the Paleoproterozoic Svecofennian orogeny, which involved accretion of several microcontinents and island arcs (Lahtinen et al., 2009). Lahtinen et al. (2009) distinguish a separate phase of the Svecofennian accretion, called the Svecobaltic



orogeny (1.83-1.8 Ga). In the cross-Baltic correlations by Bogdanova et al. (2015), the area of NE Poland belongs to a microcontinent called Amberland (Fig. 1) with the 1.83-1.84 Ga accretion age. Subsequently, the Paleoproterozoic crust was influenced by the Mesoproterozoic (1.54-1.45 Ga) anorogenic magmatic activity producing anorthosite-mangerite-charnockite-granite (AMCG) complexes in a ~600 km long zone stretching from Belarus, through Lithuania, NE Poland and southern Baltic Sea (Dörr et al., 2002; Skridlaite et al., 2003; Krzemińska et al., 2017). No signature of the Svekonorwegian orogeny (1.14-0.9 Ga) affecting the western rim of Fennoscandia (Bogdanova et al., 2008) was recognized in our study area. Ediacaran rifting during the Rodinia break-up (e.g., Johansson, 2009) eventually led to the formation of a passive margin of Baltica in the early Cambrian. No magmatic activity related to this stage of the EEC margin development was recognized in NE Poland. The western part of the study area was also affected by the Caledonian tectonics. An extensive flexural basin, named the Baltic Basin, was developed in the Silurian in front of the Caledonian orogen. The basin focused deposition of a fine-grained siliciclastic succession up to 4000 m thick that gradually thins out to the east and constitutes most of the Phanerozoic platform cover of the EEC. The western part of the Baltic Basin was intensely folded to form the Pomeranian Caledonides. The concept of Pomeranian Caledonides was initially based on the analysis of the deep research wells (Dadlez et al., 1994), but it was recently confirmed by the PolandSPAN™ line 5600, which was interpreted to image the frontal thrust of the deformed Upper Ordovician and Silurian sedimentary succession with the undeformed lower Paleozoic sediments of the Baltic Basin (Mazur et al., 2016a). The youngest magmatic episode affecting the EEC crust included lower Carboniferous (354-338 Ma) alkali magmatism with several syenite intrusions (Fig. 2; e.g., Krzemińska et al., 2017), coeval with the dolerite sills intruding Silurian sediments offshore Lithuania (Motuza et al., 2015). According to the revised lithostratigraphy (Krzemińska et al., 2017), crystalline basement units of the study area can be further subdivided into the Dobrzyń Domain (DD), Mazury Complex (MC) and Pomerania-Blekinge Belt (PBB) (Fig. 2). The DD (1.82-1.76 Ga) basement comprises synorogenic granites and supracrustal paragneisses. The PBB (1.79-1.74 Ga) basement includes synorogenic granodiorites, quartz monzonites and granites, whereas the MC (1.54-1.49 Ga) is composed of the anorogenic AMCG association: quartz monzonites, charnockitoids, diorites and monzogabbros. Their occurrences are well-visible in the magnetic anomaly map (Fig. 3).

### 3 Data and methods

#### 3.1 Acquisition

The PolandSPAN™ project employed high-end acquisition parameters that were primarily optimized to provide a continuous image of the lower Paleozoic shale basins. Data were acquired with a 25 m receiver/shot spacing and 960-channel symmetric spread (max. offset of 12 km), providing nominal fold of 480 with a CDP spacing of 12.5 m. The source array consisted of four INOVA AHV-IV Commander (62,000 lb. peak force) Vibroseis trucks. A custom broadband (2-150 Hz) 16-s long ( $\tau_{sweep}$ ) sweep was used. In the field, uncorrelated data (28 s of listen time,  $\tau_{record}$ ) were recorded alongside with auxiliary data containing measurements of weighted-sum ground force ( $F_{ws}$ ), an estimate of the vibrator ground force ( $F_g$ ) (Ziolkowski, 2010) for each vibrator in the array.

#### 3.2 Processing

ION Geophysical original time and depth imaging were focused on the sedimentary cover structure. Processing sequence was optimized to keep the original sweep bandwidth in the sediments. Reflection tomography was used to build the velocity model for pre-stack depth migration (PSDM) in the sediments, while below the basement, WARR-derived velocities were used. The nominal record length of 12 s enabled imaging down to the lower crust on average. Malinowski and Brettwood (2013) and Malinowski (2016) provided a proof-of-concept that using the extended correlation method of Okaya and Jarchow (1989), PolandSPAN™ data can be extended to greater times (~20 s). It was also demonstrated, that despite

relatively short (16 s vs 45-60 s long sweeps used during the POLCRUST-01 acquisition, Malinowski et al., 2013) and broadband (2-150 Hz as opposed to 6-64 Hz) sweep, reliable imaging of the deeper structures (including the Moho) can be obtained.

Therefore, the first step in our reprocessing was the application of the self-truncating extended correlation, which increased the nominal record length  $t_{profile}$  from 12 s to 22 s. “Self-truncating” means that the signal we correlate with truncates on its own, preserving the full frequency band for the original record length but losing bandwidth at the extended time. Given the acquisition parameters of the PolandSPAN™ survey, a maximum frequency  $f_{max}$  was limited to 57.5 Hz at 22 s of extended time. It can be derived using the following formulas of Okaya and Jarchow (1989):

$$\tau_{record} = \tau_{sweep} + \tau_{listen} \quad (1)$$

$$t_{profile} = \tau_{record} - \tau_{sweep} \quad (2)$$

$$f_{max}(t) = f_1 \quad 0 \leq t \leq t_{profile} \quad (3)$$

$$f_{max}(t) = f_1 - \frac{f_1 - f_0}{\tau_{sweep}}(t - t_{profile}) \quad t_{profile} \leq t \leq \tau_{record}$$

In the case of Vibroseis acquisition, data are usually correlated with the theoretical (pilot) sweep. As mentioned above, for the PolandSPAN™ data, we have the ground-force estimates for every Vibroseis point (VP) location. When Malinowski (2016) compared stacks of the data correlated with both pilot sweep and ground force estimate averaged over all VPs, he found out that substituting one for another in the correlation process, did not contribute to a significant change in the final stack quality. However, in this study, we prefer to correlate raw data with a ground force averaged for every VP, since it is more realistic to use spatially-varying ground-force estimates (which should compensate for variable baseplate coupling), rather than a simple theoretical signal.

After the re-correlation process, we started the basic processing sequence, which was focused on the mid- to lower crust and the upper mantle depths. For quality control purposes, several stacked sections for each line were produced at various stages and thoroughly assessed in terms of how processing methods and their parameters affected the seismic signal. Following this routine, the most effective processing sequence and parameter configuration were determined. The processing is summarized in Table 1.

We put a lot of effort into estimating the refraction static corrections, as we decided not to use the contractor's solution. Towards this end, we employed an in-house Neural Network based algorithm (Mezyk and Malinowski, 2018) for picking first breaks. Both elevation statics and refraction statics were applied here, using a datum elevation of 400 m and a replacement velocity of 2250 m/s (same as for original processing). Initially, we processed the data with a relative-amplitude preservation, however, it turned out that qualitatively better results for the deeper crust were obtained with a pre-stack AGC scaling (5 s window). We used ION Geophysical pre-stack time migration (PSTM) Vrms velocity models for the NMO/DMO corrections. Mild coherency filtering was applied pre-stack (only FX deconvolution). Dip moveout corrections (DMO) appeared to be vital. It brought improvements into the sections, by strengthening the continuity of reflectors and correcting for conflicting dips. In general, migrating the DMO-corrected stacked sections provided a clearer image with increased reflection consistency both in the vertical and horizontal direction. After the DMO-stack, signal coherency was substantially increased with a post-stack linear dip filtering. It required careful tuning of the parameters not to create artificial events. Dip-filtered stacks were subsequently migrated. We tested the line-segment migration code (Calvert, 2004), but because of the generally noisier appearance of such migrated sections, we prefer to use simple F-K (Stolt) migration. Finally, depth conversion was carried out. Velocity models for depth conversion were merged from the PSDM velocity models provided by ION Geophysical for the section above the basement and the compilation of the crustal velocity model for Poland derived from WARR data (Grad et al., 2016) for the deeper section below the basement.



## 4 Results

Final migrated, depth-converted sections, presented in Figures 4 and 5, formed the basis for defining the structural relationships and reflector orientations. The reprocessed profiles illustrate a variety of crustal reflectivity patterns, reflection Moho and dipping mantle reflections. In order to facilitate interpretation, the amplitude envelope is computed from the final stacks, smoothed, and displayed as a colour background.

Signal-penetration depth was estimated from the amplitude and average frequency decay curves (Fig. 6), extracted from the final stacked sections, following Barnes (1994). In order to detect amplitude variability along the profiles, each seismic section is divided into two parts within which the corresponding decay curves are calculated. Amplitude-decay curves represent the root-mean-squared (RMS) amplitude generated using a 200-ms long sliding window that yields the curves not too smooth nor overly spiky. In order to derive frequency-decay curves, first, the amplitude spectra were computed for each CDP trace in 200-ms long windows. Next, the weighted average was applied individually to all of the spectra in the frequency range of 10-20 Hz, where weights were defined by amplitude values. The average frequency in windows was subsequently averaged again over the CDP range, which produced a single curve for each half of the profile.

*were these curves generate before or after AGC?*

Analysis of the reprocessed seismic sections show that, in general, reflectivity of the crust is not stationary, and its intensity may vary from high (e.g. L1200 at 3000-6000 CDP) to low (e.g. L5400 at 3500-5000 CDP), or even can be characterized as acoustically transparent (e.g. L5400 at 1500-3500 CDP), indicating gradual transition from crustal to mantle rocks. Observed intracrustal reflections are mostly discontinuous, but not chaotic. They form patterns that can be either subhorizontal (e.g. L5400 at ~8 km & 5000-10000 CDP) or gently dipping at an angle not exceeding 20 degrees (e.g., L5600 at 12-22 km & 7000-11000 CDP). The presence of abnormally strong reflectivity zones can also be marked, especially in a depth range of 20 to 36 km in the area where lines 5400 and 1200 are crossing. The transition between the lower crust and the uppermost mantle is often trackable, undulating slightly between 36-42 km, yet in some parts of the stacked sections, the signal penetration is insufficient to image Moho. It is clearly visible in the case of line 5400, where the amplitude decay curves calculated for the SW and NE part are substantially different in terms of the reflectivity strength. Without averaging over thousands of CDPs, the decay amplitudes would die-out by reaching 20 km for the transparent CDP interval between 1500 and 3500. In contrary to poorly defined Moho in this part of line 5400, a very sharp boundary is observed along line 5600 and 1200, in a CDP range of 3000-6000 and 1-2500, respectively. The stacked section for line 5400 shows the evidence of a small symmetrical Moho uplift, that emerges around CDP 6000 and spans for ~90 km in the NE direction. Moho is also apparent on both amplitude and frequency decay curves (which we tend to present in the time domain as originally calculated) as a change in a decay rate at  $13 \pm 1$  s of two-way time, where curves cease to decay. It corresponds roughly to a depth of 40 km, a level characterized by sudden reflectivity drop on the seismic sections presented in the depth domain. Some reflections might find their continuation in the upper mantle, like events visible at line 5600 and 1200, between CDP 1-2000 and 13500-14500, respectively. Some of the weaker sub-Moho reflectivity might be related to the migration artefacts or other processing footprints, however, the stronger ones (e.g. the one at line 5600) seems to be real.

*the*

## 5 Discussion and preliminary interpretation

The reprocessed PolandSPAN™ profiles from NE Poland are showing much more complex architecture of the EEC crust as compared with the WARR data (Grad et al., 2010), which is not surprising given the methodology employed in the case of near-vertical incidence reflection profiling and WARR acquisition and modelling. However, as discussed below, it is not only an issue of more complex reflectivity observed in the reflection profiles but also a redefinition of the middle/lower crust and Moho depths.

The thickness of the Phanerozoic platform cover varies from ~7-8 km in the SW to less than 2 km in the NE (Fig. 7 and 8). With few exceptions (e.g. SW part of line 5400, Fig. 8), reflection Moho is relatively well defined as a band of reflectors dividing reflective crust from the generally more transparent upper mantle. In the following comparisons, we use the compilation of WARR data by Majdański (2012), including the top lower crust and Moho horizons. The depth to WARR Moho varies smoothly along the interpreted PolandSPAN™ profiles between 38 and 43 km with a typical value around 40 km, being close to the global average of the “normal” continental crust (Christensen and Mooney, 1995). The agreement between such defined WARR Moho and the assumed crust-mantle boundary interpreted in the reflection data is good, with some notable exceptions. Reflection Moho along line 1200 is ~2-3 km shallower than the WARR Moho (Fig. 7). Reflection Moho in the NE part of line 5600 is up to 4 km shallower. Reflection Moho along line 5500 is ~2 km shallower. In the case of line 5400, there is a Moho uplift (~2-3 km) observed (see discussion on the AMCG complex below). However, considering the fact that the velocities in the sediments are poorly resolved in WARR models and we used here reflection-derived velocities for sediments, those changes can be attributed to the differences between those two methods. The lower crust has generally a much-reduced thickness as compared with the WARR model. We can note some distinct lower crustal reflectivity patterns, with a common observation that the lower crust is reflective close to its top.

The main type of reflections corresponds to the gently dipping to subhorizontal structural layering, presumably representing Svekofenian orogenic fabric (Figs. 7, 8). A number of low-angle detachments (15-20°) branch off from the subhorizontal fabric, being followed by sub-parallel layering. These detachments, probably matching ductile thrust shear zones, are dipping towards NE and SE in the NE-SW and NW-SE oriented sections, respectively (Figs. 7, 8). Collectively, their geometry is consistent with the previously postulated SW to W polarity of the Svekofenian orogen (e.g., Park, 1985; Gorbatshev and Bogdanova, 1993; Korja and Heikkinen, 1995, 2005; Nironen, 1997). The SW-ward polarity of the orogen is also in accord with the NE dipping upper mantle reflectors that may correspond to the preserved relics of a Paleoproterozoic subduction zone. In several places, at a lower/middle crust level, the subhorizontal reflectors or NE-dipping shear zones are truncated by a package of reflectors with an opposite, i.e., NW- or SW-directed dip, e.g. line 1200 between CDP 1000-4000 (Fig. 7) and line 5400 between CDP 9000-12000 (Fig. 8). These SW-dipping events comprise straight reflections flanked by reflections bent into parallelism with the SW-inclined packages. Consequently, subhorizontal or NE-dipping sets of reflectors often acquire a sigmoidal shape with terminations aligned into the SW-dipping events. The latter presumably correspond to extensional or transtensional shear zones of uniform geometry and kinematics throughout the studied sections. Both sets of structures identified in the seismic images jointly delineate a kilometer-scale S-C' fabric related to the SW-directed (in the present-day coordinates) mid- and lower crustal flow. The subhorizontal to NE dipping, often sigmoidal reflectors represent first-order orogen-scale shear planes (S), whereas the SW-dipping events correspond to extensional shear zones (C') produced during orogen-scale non-coaxial flow. A similar fabric was described by Torvela et al. (2013) for the FIRE profiles onshore Finland. These authors link the structural pattern observed to the overall convergent tectonic setting of the accretionary Svecofennian orogeny (1.96–1.76 Ga; Korja and Heikkinen, 1995, 2005; Torvela et al., 2013). Following classical studies by Beaumont et al. (2001) and Vanderhaege and Teyssier (2001), Torvela et al. (2013) postulate syn-convergent flow of hot lower and middle crust comparable to that presently connected with the Tibetan Plateau (e.g., Beaumont et al., 2001, 2006; Lee and Whitehouse, 2007). According to these models, partial melting of thermally mature thickened orogenic crust and associated widespread migmatization results in the generation of low-viscosity crustal layer that may undergo extension in an overall convergent setting (e.g., Beaumont et al., 2001; Vanderhaege and Teyssier, 2001). Drill core data from the Paleoproterozoic basement of NE Poland actually confirm widespread migmatization and syn-orogenic magmatism at the time of the Svekofenian orogeny (Krzemińska et al., 2017).



We favour syn-convergent crustal flow explanation over late- to post-orogenic extensional collapse (Korja and Heikkinen, 1995, 2005) also because of structural record from the AMCG igneous suite (Cymerman, 2004, 2014). Structural analysis of drill cores suggests localized compressive deformation of the Mesoproterozoic (1.54-1.45 Ga) AMCG intrusions (Cymerman, 2004, 2014) implying cessation of orogenic-scale extension by the time of their emplacement. Formation of the S-C' fabric, revealed by the seismic data, must have been already accomplished before the AMCG magmatism. Furthermore, seismic-scale deformational features are not imaged within the plutons (Figs. 7, 8). However, some possible contacts of the AMCG bodies coincide with zones of increased crustal reflectivity suggesting that reactivation of inherited shear zones may have provided conduits for emplacement of magma. Consequently, we propose that delamination of overthickened Svecofenian lithosphere may have accounted for underplating of gabbroic magma that fractionated into the AMCG plutons in NE Poland, following classical models of the AMCG magmatism (see McLelland et al., 2010 for review). The gabbroic parental magma yielded anorthositic derivatives subsequently ascending into the middle to upper crust together with granitoids derived by crustal anatexis (e.g., McLelland et al., 2010). Increased mantle reflectivity below the AMCG bodies, observed both for line 1200 and 5400 (marked by the ellipse in Figs. 7-8), could be related to delaminated lower crustal material. Sub-Moho reflectivity was also observed along the POLONAISE'97 P4 profile between P3 and P5 profiles (Grad et al., 2002). The exact shape of the lower/middle crustal gabbroic body and its position with respect to the inferred subcrop of the MC AMCG rocks is likely controlled by the interplay between the magmatism and the structure developed during the Palaeoproterozoic collisional and post-collisional deformations – a mechanism suggested for the Korosten Pluton by Bogdanova et al. (2004). Bright lower crustal reflectors and their complex shape (with some truncations) observed in the vicinity of the AMCG suite along lines 1200 and 5400 seems to support such an idea.

There is an interesting reflector (marked S in Fig. 8) observed along line 5400 for more than 60 km between CDPs 5000-10000 at a depth of ~7-9 km. It was also visible in the original ION Geophysical time/depth imaging, as well as in the industry seismic data from this area (P. Krzywiec, pers. comm.). It is offset with respect to the magnetic high crossed by line 5400 (Fig. 3). The S reflector can be tentatively linked with the AMCG intrusion, representing a sill (or top of the layered intrusion) fed by the mafic dykes as in the Shumlyanskyy's et al. (2017) model for the Korosten Pluton in Ukraine. An alternative explanation invokes a much younger magmatic event. Since the lower Carboniferous syenite intrusion of the Olsztyn Massif (Fig. 2) is less than 100 km to the SE of line 5400, the S-reflector (and associated deeper subhorizontal reflectors) can be alternatively interpreted as intrusions of this age. Such an explanation of the S-reflector origin is also supported by the fact that the lower Carboniferous sills were drilled offshore Lithuania (Motuza et al. 2015).

The BABEL seismic profiles in the Baltic Sea imaged several dipping sub-Moho reflectors projecting into the Fennoscandian mantle (Abramovitz et al., 1997; BABEL Working Group, 1993; Balling, 2000; Korja and Heikkinen, 2005). The pronounced dipping mantle reflector observed NE of the Bornholm area along the BABEL A line (from 40 to 65 km depth) was interpreted by Balling (2000) as a relic of paleosubduction occurring at ~1.8-1.7 Ga. The same reflections projecting into the mantle were also imaged by the DEKORP-PQ profiles parallel to the BABEL A profile close to Bornholm and they were also attributed to the Proterozoic terrane accretion (Krawczyk et al., 2002; Meissner and Krawczyk, 1999). Projecting the BABEL A and PQ mantle reflectors to line 5600, suggests that we may observe the same feature at the SW end of this profile. Krawczyk et al. (2002) concluded that the Baltica crust was not mechanically involved in the Caledonian collision. This view can be supported by the recent study by Mazur et al. (2016b), who suggested that the CDF is a thin-skinned feature. Therefore, we do not link the observed reflectivity patterns (including mantle reflectors) with the Caledonian deformations, but consider them to represent Proterozoic accretion signature.

## 6 Conclusions

Reprocessing of ~950 km of the regional seismic profiles from the PolandSPAN™ project provided for the first time a detailed picture of the EEC (Fennoscandian) crust in NE Poland. It revealed reflectivity patterns that we primarily associate with the Paleoproterozoic crust formation during the Svekofennian (Svekobaltic) orogeny and which are similar to what is observed along the BABEL and FIRE profiles in the Baltic Sea and onshore Finland, respectively (Korja and Heikkinen, 2005; Torvela et al., 2013). We suggest that a seismic-scale S-C' fabric of the Paleoproterozoic crust was shaped by mid- to lower-crustal flow in a convergent setting during the Svecofenian orogeny. We propose that delamination of the overthickened Svecofenian lithosphere and resulting asthenospheric ascent, partial melting of lithospheric mantle and ponding of gabbroic melt at the crust–mantle interface (McLelland et al., 2010) can be reconciled with the crustal fabric observed and explain the emplacement of the Mesoproterozoic AMCG suites in NE Poland. We also found sub-Moho dipping mantle reflectivity, which we tentatively explain as a signature of paleosubduction occurring prior to the Svekofennian orogeny. Later tectonic phases (e.g. Ediacaran rifting, Caledonian orogeny) did not leave a clear signature in the deeper crust, however, some of the subhorizontal reflectors below the basement can be linked with a lower Carboniferous magmatism.

## Author contribution

Conceptualization, MMal; Methodology, MM & MMal.; Software, MM; Validation, MM & MMal.; Formal Analysis, MM, MMal & SM; Investigation, MM & MMal.; Resources, MMal; Data Curation, MM & MMal; Writing – Original Draft Preparation, MM, MMal & SM.; Writing – Review & Editing, MM, MMal & SM; Visualization, MM, MMal & SM.; Supervision, MMal; Project Administration, MMal.; Funding Acquisition, MMal.

## Competing interests

The authors declare that they have no conflict of interest

## Acknowledgments

This study was funded by the Polish National Science Centre grant no UMO-2015/19/B/ST10/01612. We are grateful to A. Calvert for sharing his coherency filtration and segment migration codes with us. We are indebted to ION Geophysical for permission to use and show PolandSPAN™ data. Processing was done using GlobeClaritas™ software under the license from GNS Science, New Zealand.

## References

- Abramovitz, T., Berthelsen, A. and Thybo, H.: Proterozoic sutures and terranes in the southeastern Baltic Shield interpreted from BABEL deep seismic data, *Tectonophysics*, 270(3–4), 259–277, doi:10.1016/S0040-1951(96)00213-2, 1997.
- BABEL Working Group: Deep Seismic Reflection/Refraction Interpretation of Crustal Structure Along Babel Profiles A and B In the Southern Baltic Sea: Babel Working Group\*, *Geophys. J. Int.*, 112(3), 325–343, doi:10.1111/j.1365-246X.1993.tb01173.x, 1993.
- Balling, N.: Deep seismic reflection evidence for ancient subduction and collision zones within the continental lithosphere of Northwestern Europe, *Tectonophysics*, 329(1–4), 269–300, doi:10.1016/S0040-1951(00)00199-2, 2000.
- Barnes, A. E.: Moho reflectivity and seismic signal penetration, *Tectonophysics*, 232(1–4), 299–307, doi:10.1016/0040-1951(94)90091-4, 1994.
